# Supplementary material
Source: PubMed Central journal article supplement (PMC2778864)
Supplement: NIHMS135231-supplement-01.pdf [file NIHMS135231-supplement-01.pdf]

## Supporting information

pH- and mol-ratio dependent formation of zinc(II) coordination polymers with iminodiacetic acid: Synthesis, crystal structure, spectroscopic and thermal studies

**Lu-Bin Ni<sup>a</sup>, Rong-Hua Zhang<sup>a</sup>, Qiong-Xin Liu<sup>a</sup>, Wen-Sheng Xia<sup>a</sup>, Hongxin Wang<sup>b</sup>, Zhao-Hui Zhou<sup>a,b,\*</sup>**

<sup>a</sup> *State Key Laboratory of Physical Chemistry of Solid Surface, , National Engineering Laboratory for Green Chemical Productions of Alcohols-Ethers-Esters, College of Chemistry and Chemical Engineering, Xiamen University, Xiamen 361005, China,* <sup>b</sup> *Physical Biosciences Division, Lawrence Berkeley National Laboratory, Berkeley, California 94720, USA*

- Figure S1. View of 1-D chain in complex **1**, with hydrogen atoms omitted for clarity.
- Figure S2. View of 1-D zigzag chain in complex **2**, with hydrogen atoms omitted for clarity
- Figure S3. The 3D supramolecular network of [Zn(ida)(phen)(H<sub>2</sub>O)]·2H<sub>2</sub>O (**4**) by hydrogen-bond and  $\pi$ - $\pi$  interaction viewed down the bc plane.
- Figure S4. Photoluminescence spectra of 1, 10-phen, [Zn(ida)(phen)(H<sub>2</sub>O)]·2H<sub>2</sub>O (**4**) in solid state at room temperature. The corresponding excitation wavelengths,  $\lambda_{\text{ex}}$  are 331nm, 340nm, respectively.
- Figure S5. <sup>13</sup>C NMR spectra of the solutions of free iminodiacetate ligand at various pH values.
- Figure S6. TGA curves of (NH<sub>4</sub>)<sub>n</sub>[Zn(Hida)Cl<sub>2</sub>]<sub>n</sub> (**1**, black), [Zn(ida)(H<sub>2</sub>O)<sub>2</sub>]<sub>n</sub> (**2**, red), [Zn(Hida)<sub>2</sub>]<sub>n</sub>·4nH<sub>2</sub>O (**3**, blue), [Zn(ida)(phen)(H<sub>2</sub>O)]·2H<sub>2</sub>O (**4**, green)

Figure S7. EDS results of (a)  $(\text{NH}_4)_n[\text{Zn}(\text{Hida})\text{Cl}_2]_n$  (**1**) calcined at  $500^\circ\text{C}$  for 4h; (b)  $[\text{Zn}(\text{ida})(\text{H}_2\text{O})_2]_n$  (**2**) calcined at  $500^\circ\text{C}$  for 4h; (c)  $[\text{Zn}(\text{Hida})]_n \cdot 4\text{H}_2\text{O}$  (**3**) calcined at  $500^\circ\text{C}$  for 4h

Figure S8. SEM image of  $[\text{Zn}(\text{Hida})]_n \cdot 4\text{H}_2\text{O}$  (**3**) and  $[\text{Zn}(\text{ida})(\text{phen})(\text{H}_2\text{O})] \cdot 2\text{H}_2\text{O}$  (**4**) calcined at  $500^\circ\text{C}$  for 4h.

Figure S9.  $^1\text{H}$  NMR spectra of  $(\text{NH}_4)_n[\text{Zn}(\text{Hida})\text{Cl}_2]_n$  (**1**),  $[\text{Zn}(\text{ida})(\text{H}_2\text{O})_2]_n$  (**2**) and  $[\text{Zn}(\text{Hida})_2]_n \cdot 4\text{nH}_2\text{O}$  (**3**) in  $\text{D}_2\text{O}$ .

Figure S10. IR spectra of the zinc complexes  $(\text{NH}_4)_n[\text{Zn}(\text{Hida})\text{Cl}_2]_n$  (**1**),  $[\text{Zn}(\text{ida})(\text{H}_2\text{O})_2]_n$  (**2**),  $[\text{Zn}(\text{ida})(\text{phen})(\text{H}_2\text{O})] \cdot 2\text{H}_2\text{O}$  (**4**) and  $[\text{Zn}(\text{Hida})_2]_n \cdot 4\text{nH}_2\text{O}$  (**3**).

Figure S11. UV-Vis diffuse reflection spectra of  $\text{H}_2\text{ida}$ ,  $(\text{NH}_4)_n[\text{Zn}(\text{Hida})\text{Cl}_2]_n$  (**1**),  $[\text{Zn}(\text{ida})(\text{H}_2\text{O})_2]_n$  (**2**) and  $[\text{Zn}(\text{Hida})_2]_n \cdot 4\text{nH}_2\text{O}$  (**3**).

Figure S12. UV-Vis diffuse reflection spectra of 1,10-phen,  $[\text{Zn}(\text{ida})(\text{phen})(\text{H}_2\text{O})] \cdot 2\text{H}_2\text{O}$  (**4**).

Figure S1

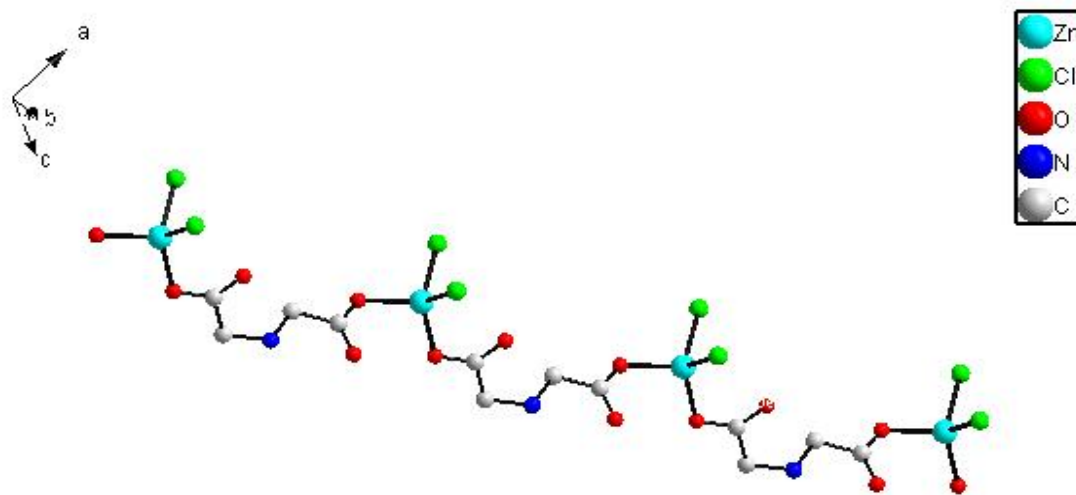

Figure S2

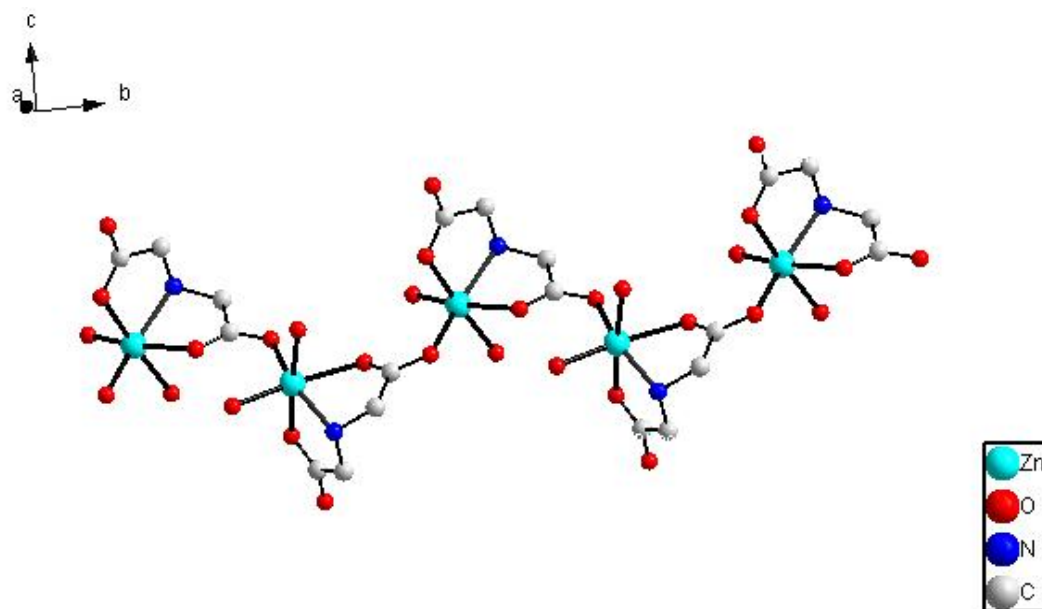

Figure S3

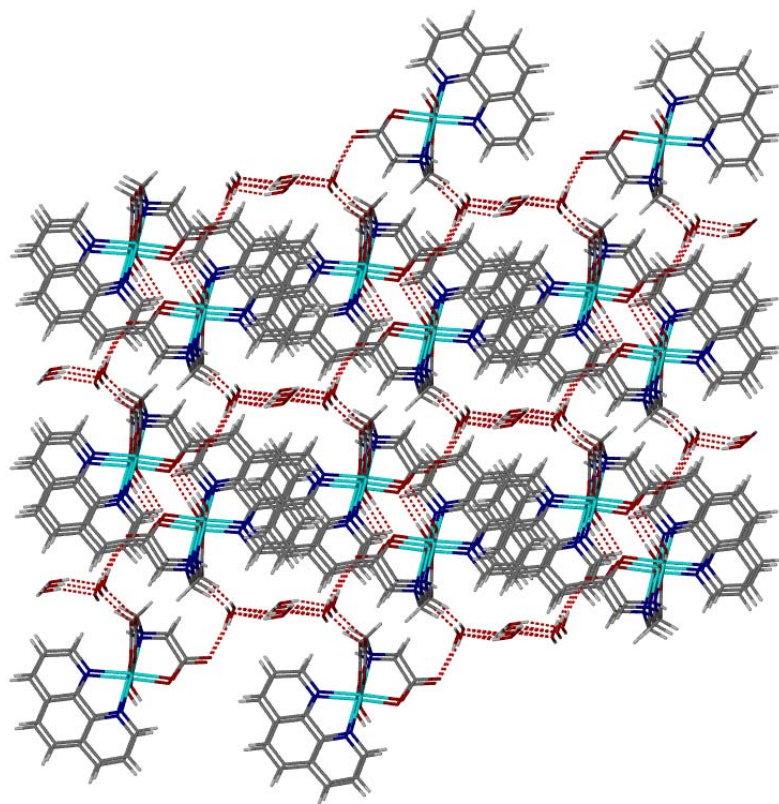

Figure S4

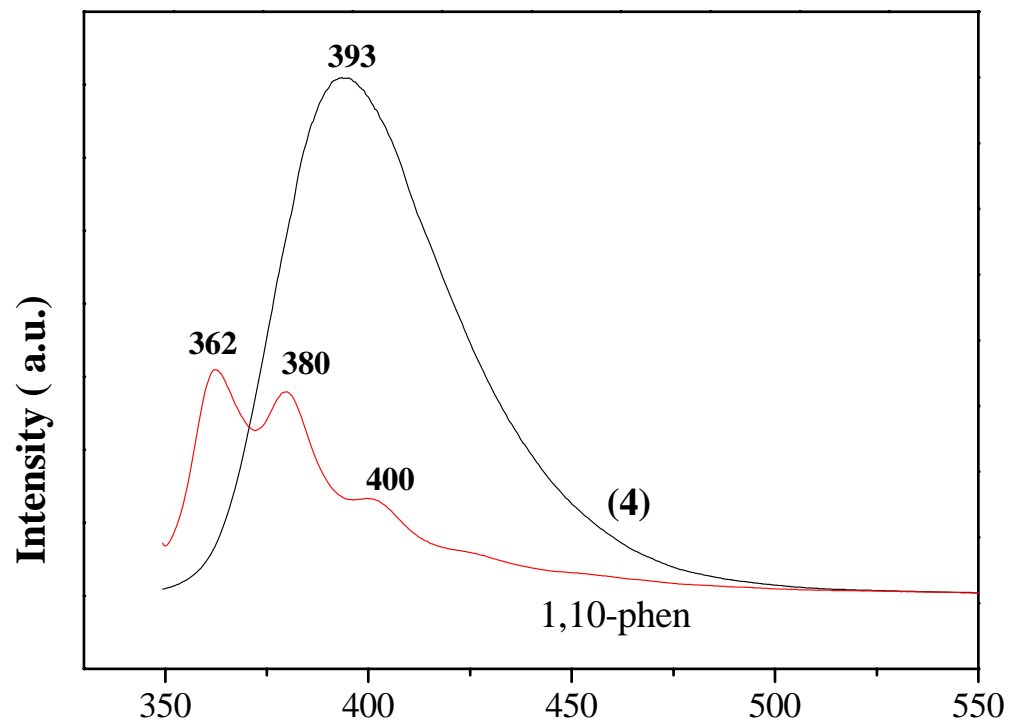

Figure S5

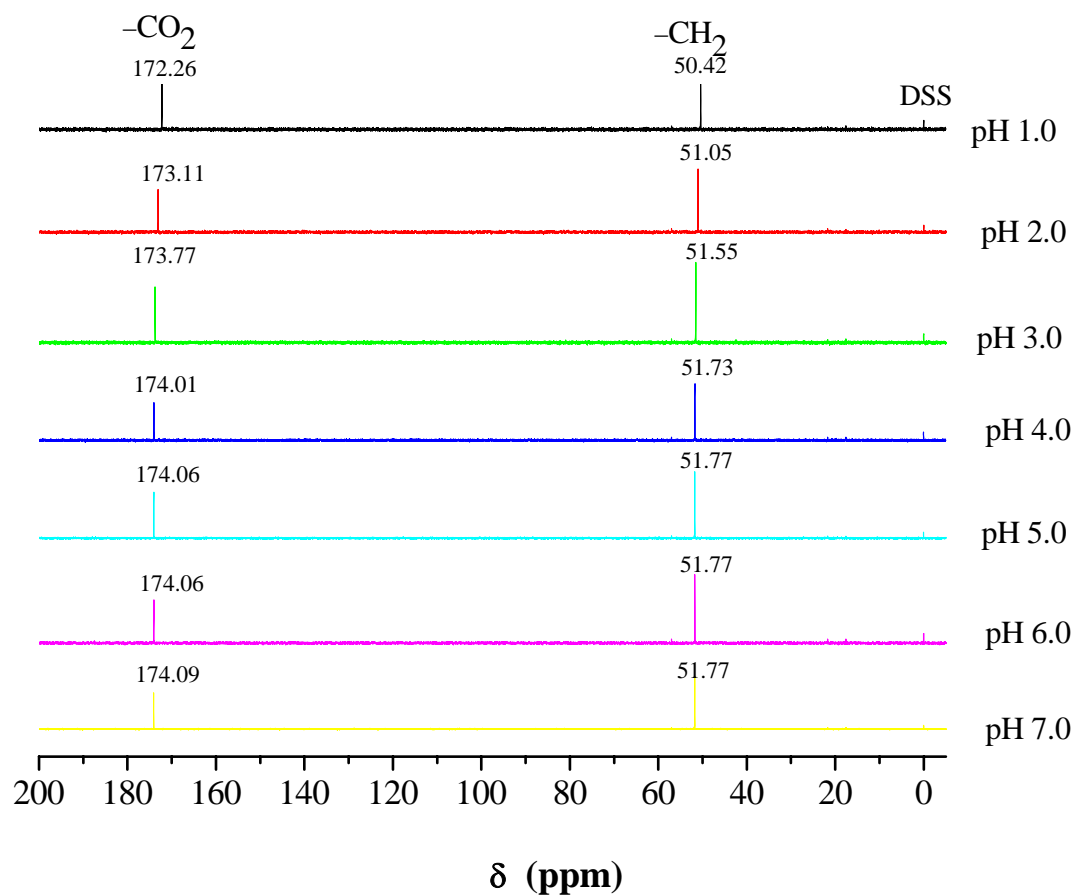

NMR Experimental section

*Preparations of the solutions of free iminodiacetate ligand at various pH values for NMR studies*

Iminodiacetic acid (6.70g, 50mmol) was dissolved in 10ml of water. The resulting solution was divided into seven parts. The pH value of each solution was adjusted (1.0 to 7.0) with ammonium hydroxide respectively. The  $^{13}\text{C}$  NMR spectra of the solutions were recorded in  $\text{D}_2\text{O}$  after 24 h.

Figure S6

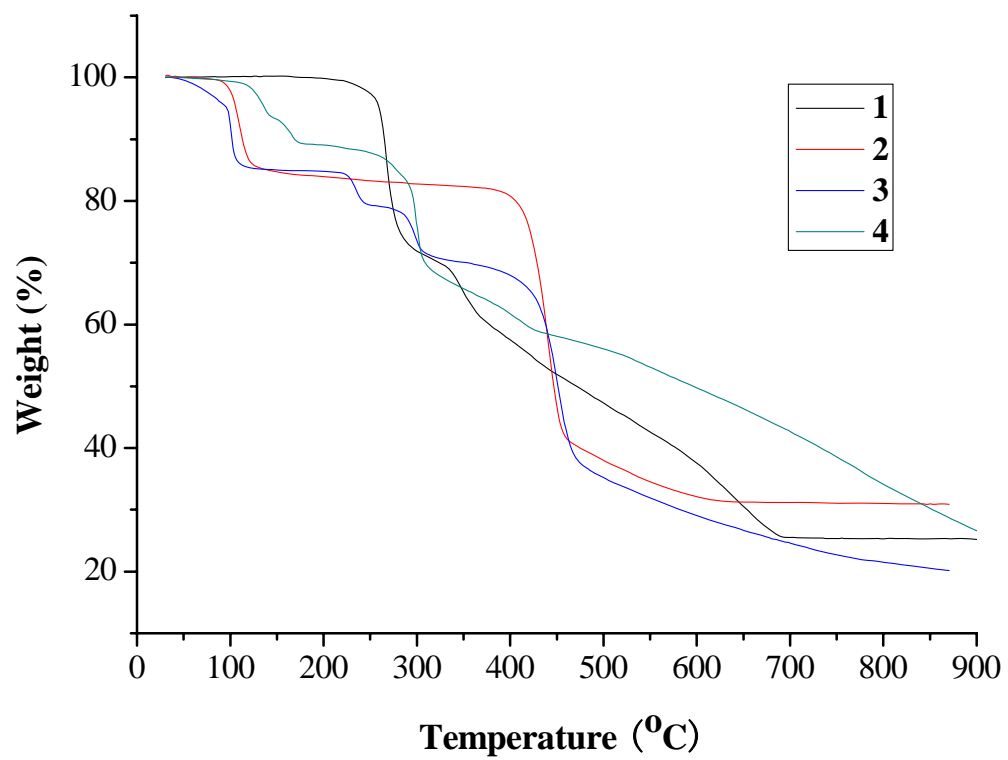



Figure S7

(a)

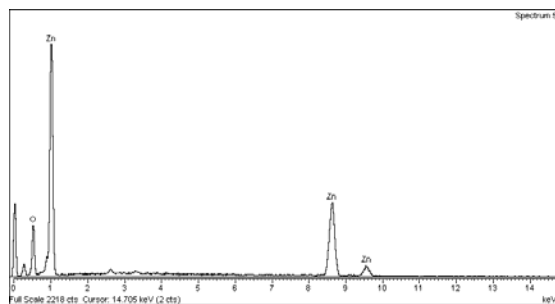

| Element | Weight% | Atomic% |
|---------|---------|---------|
| O       | 23.33   | 55.43   |
| Zn      | 76.67   | 44.57   |
| Totals  | 100.00  |         |

(b)

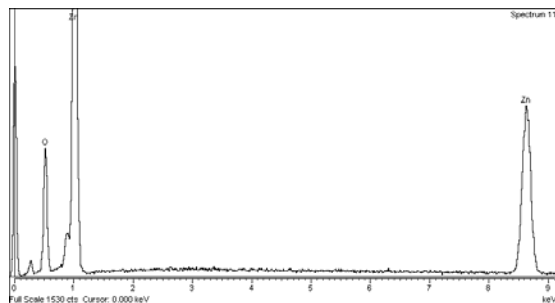

| Element | Weight% | Atomic% |
|---------|---------|---------|
| O       | 18.42   | 47.99   |
| Zn      | 81.58   | 52.01   |
| Totals  | 100.00  |         |

(c)

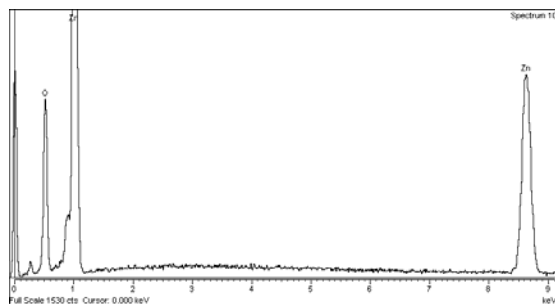

| Element | Weight% | Atomic% |
|---------|---------|---------|
| O K     | 20.57   | 51.42   |
| Zn K    | 79.43   | 48.58   |
| Totals  | 100.00  |         |

Figure S8

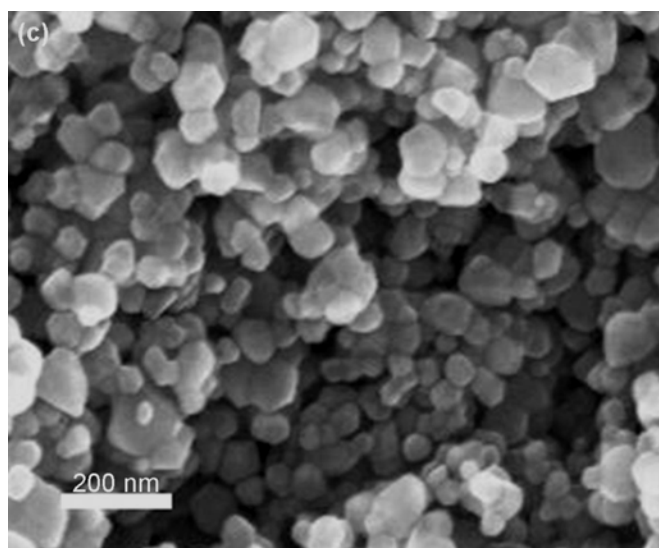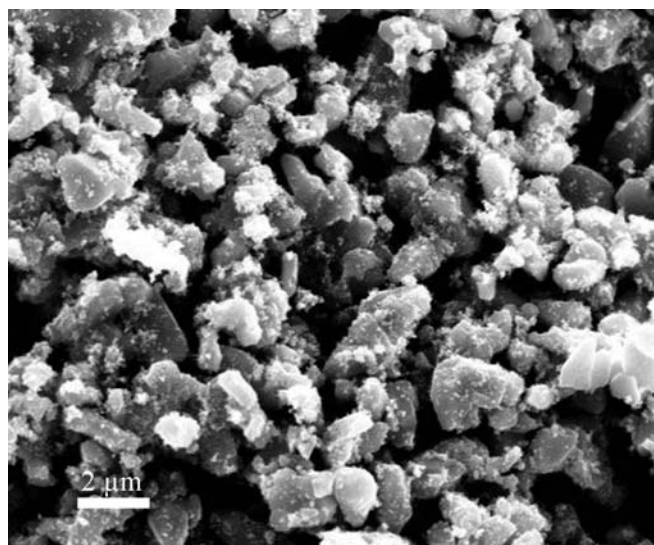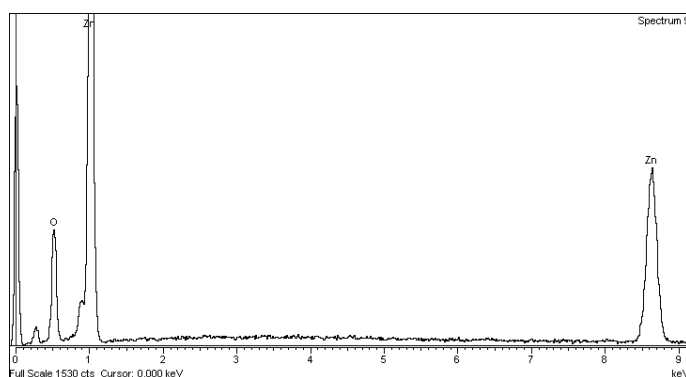

| Element | Weight% | Atomic% |
|---------|---------|---------|
| O K     | 17.70   | 46.77   |
| Zn K    | 82.30   | 53.23   |
| Totals  | 100.00  |         |

Figure S9

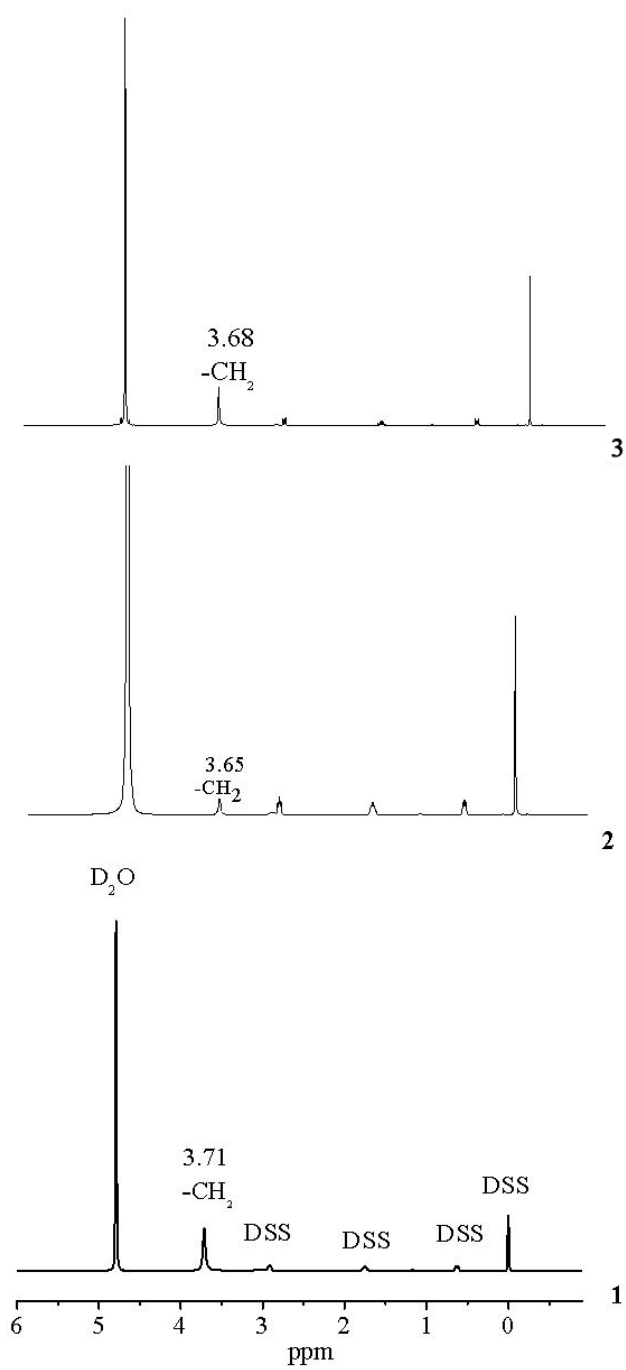

Figure S10

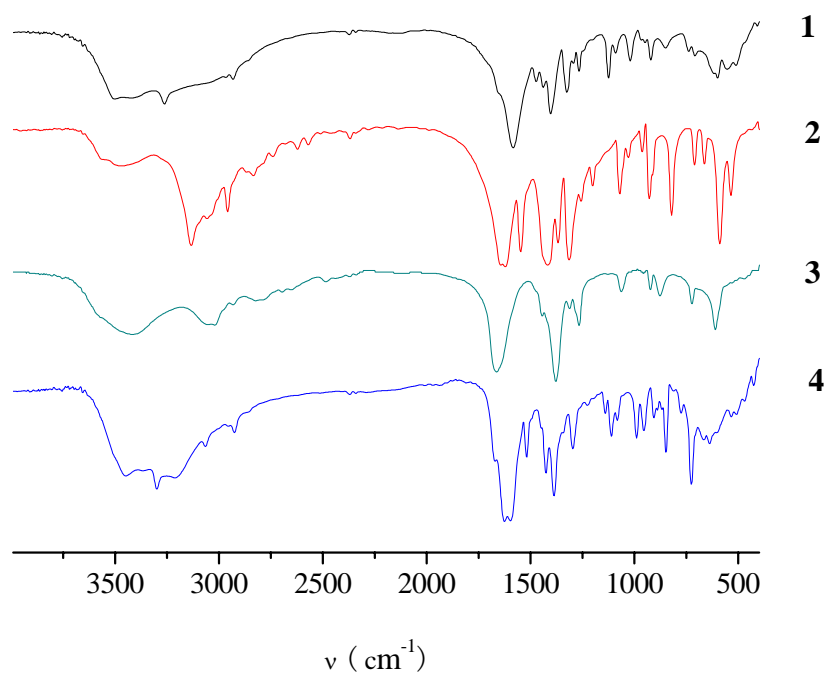

Figure S11

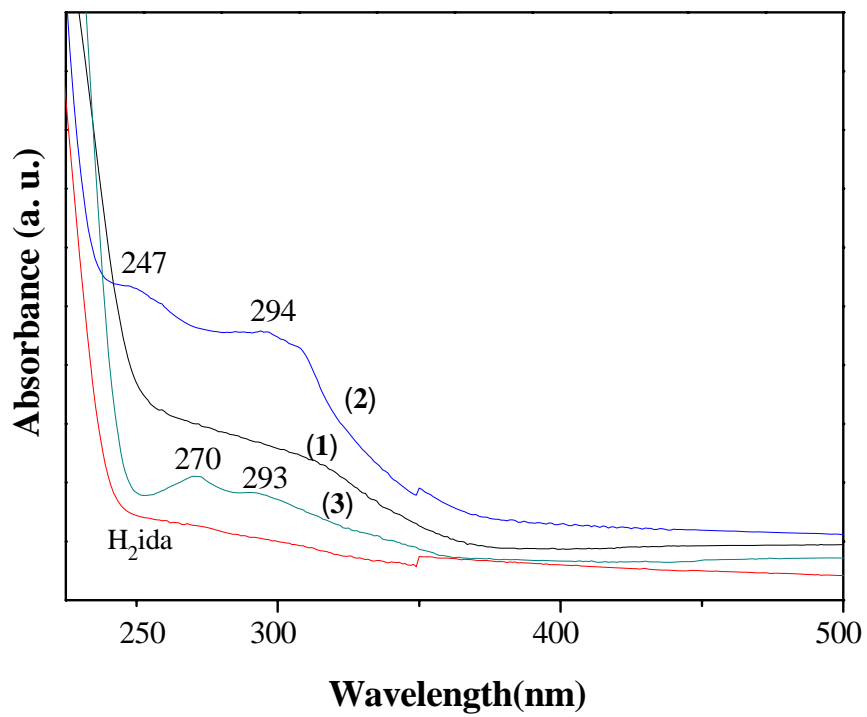

Figure S12

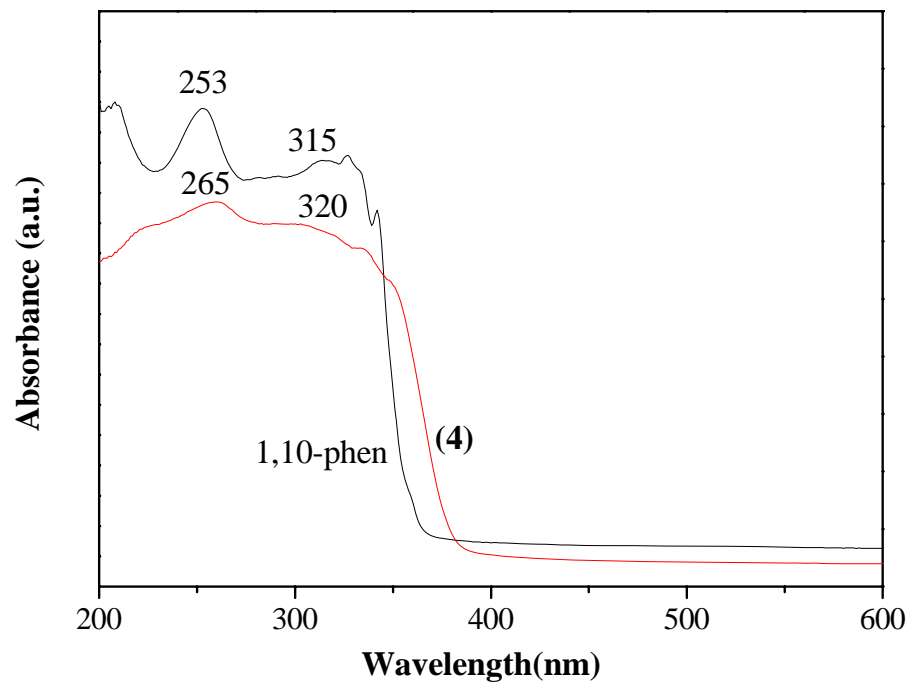

**Table S1.** Selected bond lengths (Å) and angles (°) for 1–4.

---

|                   |           |                   |           |                   |           |
|-------------------|-----------|-------------------|-----------|-------------------|-----------|
| <b>1</b>          |           |                   |           |                   |           |
| Zn(1)–O(2a)       | 1.989(1)  | Zn(1)–O(4)        | 1.966(1)  | Zn(1)–Cl(1)       | 2.2538(6) |
| Zn(1)–Cl(2)       | 2.2784(5) |                   |           |                   |           |
| O(4)–Zn(1)–O(2a)  | 102.84(6) | O(4)–Zn(1)–Cl(1)  | 115.96(5) | O(2a)–Zn(1)–Cl(1) | 117.39(4) |
| O(4)–Zn(1)–Cl(2)  | 102.95(5) | O(2a)–Zn(1)–Cl(2) | 113.93(4) | Cl(1)–Zn(1)–Cl(2) | 103.21(2) |
| <b>2</b>          |           |                   |           |                   |           |
| Zn(1)–O(1)        | 2.092(2)  | Zn(1)–O(3)        | 2.251(2)  | Zn(1)–O(4a)       | 2.010(2)  |
| Zn(1)–O(1w)       | 2.161(2)  | Zn(1)–O(2w)       | 2.107(2)  | Zn(1)–N(1)        | 2.114(2)  |
| O(4a)–Zn(1)–O(1)  | 87.66(7)  | O(4a)–Zn(1)–O(2w) | 106.27(7) | O(1)–Zn(1)–O(2w)  | 94.53(8)  |
| O(4a)–Zn(1)–N(1)  | 159.02(7) | O(1)–Zn(1)–N(1)   | 81.53(7)  | O(2 w)–Zn(1)–N(1) | 92.53(7)  |
| O(4a)–Zn(1)–O(1w) | 94.01(8)  | O(1)–Zn(1)–O(1w)  | 176.11(7) | O(2w)–Zn(1)–O(1w) | 88.38(7)  |
| N(1)–Zn(1)–O(1 w) | 95.79(7)  | O(4a)–Zn(1)–O(3)  | 86.93(7)  | O(1)–Zn(1)–O(3)   | 92.24(7)  |
| O(2 w)–Zn(1)–O(3) | 165.38(6) | N(1)–Zn(1)–O(3)   | 75.65(8)  | O(1 w)–Zn(1)–O(3) | 84.35(7)  |
| <b>3</b>          |           |                   |           |                   |           |
| Zn(1)–O(3)        | 1.963(2)  | Zn(1)–O(1)        | 1.973(2)  | Zn(1)–O(3a)       | 1.963(2)  |
| Zn(1)–O(1a)       | 1.973(2)  |                   |           |                   |           |
| O(3)–Zn(1)–O(3a)  | 109.0(1)  | O(3)–Zn(1)–O(1a)  | 115.81(8) | O(3a)–Zn(1)–O(1a) | 103.5(1)  |
| O(3)–Zn(1)–O(1)   | 103.5(1)  | O(3a)–Zn(1)–O(1)  | 115.81(8) | O(1a)–Zn(1)–O(1)  | 109.8(1)  |
| <b>4</b>          |           |                   |           |                   |           |
| Zn(1)–O(1)        | 2.187(2)  | Zn(1)–O(3)        | 2.070(2)  | Zn(1)–O(1w)       | 2.176(2)  |
| Zn(1)–N(1)        | 2.132(2)  | Zn(1)–N(2)        | 2.153(2)  | Zn(1)–N(3)        | 2.091(2)  |
| O(3)–Zn(1)–N(3)   | 98.36(8)  | O(3)–Zn(1)–N(1)   | 83.23(8)  | N(3)–Zn(1)–N(1)   | 172.90(8) |
| O(3)–Zn(1)–O(1w)  | 88.02(7)  | N(3)–Zn(1)–O(1w)  | 92.55(8)  | N(1)–Zn(1)–O(1w)  | 94.42(8)  |
| O(3)–Zn(1)–N(2)   | 175.75(8) | N(3)–Zn(1)–N(2)   | 79.15(9)  | N(1)–Zn(1)–N(2)   | 99.67(9)  |
| N(1)–Zn(1)–O(1)   | 79.16(8)  | N(2)–Zn(1)–O(1)   | 92.73(8)  | O(1w)–Zn(1)–O(1)  | 173.57(7) |
| N(2)–Zn(1)–O(1w)  | 88.65(8)  | O(3)–Zn(1)–O(1)   | 90.88(7)  | N(3)–Zn(1)–O(1)   | 93.87(8)  |

---

Symmetric transformation for **1**: a, x–1, y, z–1; **2**: a, –x+2, y–1/2, –z ; **3**: a, –x+3/2, –y+1/2, z ;
